# Supplementary material
Source: publisher figshare collection journal article supplement (https://diabetesjournals.figshare.com/articles/dataset/_/19064309)
Supplement: Supplementary file 1 [file 1]

## Sheet: Suppl GSEA
Pathway	NGenes	Direction	p-value (2-sided)	FDR (2-sided)
REACTOME_TRANSCRIPTION	180	Up	7.47e-08	9.93e-05
REACTOME_PROTEIN_FOLDING	52	Up	4.1e-07	0.000182
REACTOME_ASSOCIATION_OF_TRIC_CCT_WITH_TARGET_PROTEINS_DURING_BIOSYNTHESIS	29	Up	7.33e-07	0.000243
REACTOME_PREFOLDIN_MEDIATED_TRANSFER_OF_SUBSTRATE_TO_CCT_TRIC	26	Up	1.54e-06	0.000341
REACTOME_CELL_CYCLE_MITOTIC	304	Up	2.8e-06	0.000442
REACTOME_DNA_REPLICATION	188	Up	2.85e-06	0.000442
REACTOME_E2F_MEDIATED_REGULATION_OF_DNA_REPLICATION	34	Up	3.01e-06	0.000442
REACTOME_CELL_CYCLE_CHECKPOINTS	112	Up	3.33e-06	0.000442
REACTOME_MITOTIC_M_M_G1_PHASES	166	Up	5.95e-06	0.00061
REACTOME_RNA_POL_I_RNA_POL_III_AND_MITOCHONDRIAL_TRANSCRIPTION	103	Up	6.79e-06	0.00061
REACTOME_HOST_INTERACTIONS_OF_HIV_FACTORS	118	Up	7.58e-06	0.000612
REACTOME_ACTIVATION_OF_THE_PRE_REPLICATIVE_COMPLEX	29	Up	7.83e-06	0.000612
REACTOME_HIV_INFECTION	183	Up	9.9e-06	0.000699
REACTOME_ANTIGEN_PROCESSING_UBIQUITINATION_PROTEASOME_DEGRADATION	197	Up	1e-05	0.000699
REACTOME_METABOLISM_OF_PROTEINS	432	Up	1.06e-05	0.000707
REACTOME_FORMATION_OF_TUBULIN_FOLDING_INTERMEDIATES_BY_CCT_TRIC	20	Up	1.39e-05	0.000842
REACTOME_MRNA_DECAY_BY_3_TO_5_EXORIBONUCLEASE	11	Up	1.62e-05	0.000887
REACTOME_CLASS_I_MHC_MEDIATED_ANTIGEN_PROCESSING_PRESENTATION	227	Up	1.63e-05	0.000887
REACTOME_HIV_LIFE_CYCLE	108	Up	1.67e-05	0.000887
REACTOME_ADAPTIVE_IMMUNE_SYSTEM	473	Up	1.99e-05	0.00102
REACTOME_APOBEC3G_MEDIATED_RESISTANCE_TO_HIV1_INFECTION	5	Up	2.17e-05	0.00105
REACTOME_SYNTHESIS_OF_DNA	93	Up	2.22e-05	0.00105
REACTOME_MITOTIC_G1_G1_S_PHASES	130	Up	2.31e-05	0.00106
REACTOME_G2_M_CHECKPOINTS	42	Up	2.56e-05	0.00109
REACTOME_S_PHASE	108	Up	2.67e-05	0.00111
REACTOME_APC_C_CDC20_MEDIATED_DEGRADATION_OF_CYCLIN_B	20	Up	2.8e-05	0.00113
REACTOME_LATE_PHASE_OF_HIV_LIFE_CYCLE	94	Up	3.9e-05	0.00142
REACTOME_CITRIC_ACID_CYCLE_TCA_CYCLE	18	Up	4.02e-05	0.00142
REACTOME_GLYCOLYSIS	31	Up	4.06e-05	0.00142
REACTOME_TRANSPORT_OF_MATURE_TRANSCRIPT_TO_CYTOPLASM	52	Up	4.22e-05	0.00144
REACTOME_ORGANIC_CATION_ANION_ZWITTERION_TRANSPORT	12	Down	5.11e-05	0.00166
REACTOME_PYRIMIDINE_CATABOLISM	12	Down	5.42e-05	0.00169
REACTOME_M_G1_TRANSITION	78	Up	5.53e-05	0.00169
REACTOME_BASIGIN_INTERACTIONS	24	Up	5.67e-05	0.00169
REACTOME_RNA_POL_I_TRANSCRIPTION	70	Up	5.75e-05	0.00169
REACTOME_G1_S_TRANSITION	106	Up	5.84e-05	0.00169
REACTOME_INTEGRATION_OF_PROVIRUS	9	Up	6.13e-05	0.0017
REACTOME_PHOSPHORYLATION_OF_THE_APC_C	17	Up	6.25e-05	0.0017
REACTOME_ACTIVATION_OF_GENES_BY_ATF4	23	Up	6.26e-05	0.0017
REACTOME_TRNA_AMINOACYLATION	41	Up	6.67e-05	0.00176
REACTOME_ORC1_REMOVAL_FROM_CHROMATIN	68	Up	6.81e-05	0.00176
REACTOME_ACTIVATED_AMPK_STIMULATES_FATTY_ACID_OXIDATION_IN_MUSCLE	17	Up	7.03e-05	0.00176
REACTOME_GOLGI_ASSOCIATED_VESICLE_BIOGENESIS	48	Up	7.36e-05	0.00181
REACTOME_TELOMERE_MAINTENANCE	63	Up	7.68e-05	0.00184
REACTOME_RNA_POL_II_TRANSCRIPTION	93	Up	7.74e-05	0.00184
REACTOME_CYTOSOLIC_TRNA_AMINOACYLATION	23	Up	9.28e-05	0.00212
REACTOME_MEMBRANE_TRAFFICKING	117	Up	0.000103	0.00225
REACTOME_MEIOTIC_RECOMBINATION	67	Up	0.000108	0.00227
REACTOME_INHIBITION_OF_REPLICATION_INITIATION_OF_DAMAGED_DNA_BY_RB1_E2F1	13	Up	0.000118	0.00244
REACTOME_PI_METABOLISM	46	Up	0.000121	0.00247
REACTOME_ACTIVATION_OF_ATR_IN_RESPONSE_TO_REPLICATION_STRESS	36	Up	0.000149	0.00295
REACTOME_TRANS_GOLGI_NETWORK_VESICLE_BUDDING	53	Up	0.000153	0.00298
REACTOME_PROCESSING_OF_CAPPED_INTRON_CONTAINING_PRE_MRNA	139	Up	0.000178	0.00331
REACTOME_FGFR_LIGAND_BINDING_AND_ACTIVATION	21	Down	0.000189	0.0034
REACTOME_METABOLISM_OF_RNA	276	Up	0.000192	0.0034
REACTOME_MRNA_PROCESSING	157	Up	0.000212	0.00354
REACTOME_DESTABILIZATION_OF_MRNA_BY_TRISTETRAPROLIN_TTP	17	Up	0.000213	0.00354
REACTOME_REGULATION_OF_MITOTIC_CELL_CYCLE	77	Up	0.000223	0.00364
REACTOME_EARLY_PHASE_OF_HIV_LIFE_CYCLE	14	Up	0.000225	0.00364
REACTOME_DESTABILIZATION_OF_MRNA_BY_KSRP	18	Up	0.000233	0.00373
REACTOME_POST_TRANSLATIONAL_MODIFICATION_SYNTHESIS_OF_GPI_ANCHORED_PROTEINS	27	Up	0.000246	0.00389
REACTOME_FATTY_ACID_TRIACYLGLYCEROL_AND_KETONE_BODY_METABOLISM	165	Up	0.000251	0.00389
REACTOME_SYNTHESIS_OF_PE	11	Up	0.000252	0.00389
REACTOME_PERK_REGULATED_GENE_EXPRESSION	26	Up	0.000266	0.00402
REACTOME_APC_C_CDC20_MEDIATED_DEGRADATION_OF_MITOTIC_PROTEINS	66	Up	0.000275	0.00411
REACTOME_RNA_POL_II_PRE_TRANSCRIPTION_EVENTS	51	Up	0.000279	0.00412
REACTOME_ASSEMBLY_OF_THE_PRE_REPLICATIVE_COMPLEX	64	Up	0.000286	0.00417
REACTOME_TRANSPORT_OF_MATURE_MRNA_DERIVED_FROM_AN_INTRONLESS_TRANSCRIPT	32	Up	0.000339	0.0047
REACTOME_DESTABILIZATION_OF_MRNA_BY_BRF1	17	Up	0.000341	0.0047
REACTOME_FORMATION_OF_RNA_POL_II_ELONGATION_COMPLEX_	36	Up	0.000351	0.0047
REACTOME_MRNA_3_END_PROCESSING	34	Up	0.000352	0.0047
REACTOME_APOPTOSIS_INDUCED_DNA_FRAGMENTATION	15	Up	0.000353	0.0047
REACTOME_METABOLISM_OF_NON_CODING_RNA	47	Up	0.000353	0.0047
REACTOME_APC_CDC20_MEDIATED_DEGRADATION_OF_NEK2A	22	Up	0.000361	0.00474
REACTOME_MRNA_SPLICING	110	Up	0.000377	0.00487
REACTOME_MITOCHONDRIAL_TRNA_AMINOACYLATION	21	Up	0.000378	0.00487
REACTOME_PACKAGING_OF_TELOMERE_ENDS	36	Up	0.000387	0.00494
REACTOME_TRANSPORT_OF_RIBONUCLEOPROTEINS_INTO_THE_HOST_NUCLEUS	28	Up	0.000395	0.00499
REACTOME_CONVERSION_FROM_APC_C_CDC20_TO_APC_C_CDH1_IN_LATE_ANAPHASE	16	Up	0.000405	0.00502
REACTOME_PPARA_ACTIVATES_GENE_EXPRESSION	103	Up	0.000426	0.00524
REACTOME_ZINC_TRANSPORTERS	15	Down	0.000451	0.00549
REACTOME_INTERACTIONS_OF_VPR_WITH_HOST_CELLULAR_PROTEINS	31	Up	0.000477	0.00574
REACTOME_VIF_MEDIATED_DEGRADATION_OF_APOBEC3G	49	Up	0.000482	0.00574
REACTOME_MITOCHONDRIAL_PROTEIN_IMPORT	46	Up	0.000486	0.00574
REACTOME_DEPOSITION_OF_NEW_CENPA_CONTAINING_NUCLEOSOMES_AT_THE_CENTROMERE	51	Up	0.000488	0.00574
REACTOME_REGULATION_OF_MRNA_STABILITY_BY_PROTEINS_THAT_BIND_AU_RICH_ELEMENTS	82	Up	0.000545	0.00623
REACTOME_GLUCOSE_METABOLISM	64	Up	0.000565	0.00641
REACTOME_TRANSPORT_OF_ORGANIC_ANIONS	8	Down	0.000598	0.00662
REACTOME_PLATELET_ACTIVATION_SIGNALING_AND_AGGREGATION	198	Up	0.00062	0.00677
REACTOME_OXYGEN_DEPENDENT_PROLINE_HYDROXYLATION_OF_HYPOXIA_INDUCIBLE_FACTOR_ALPHA	16	Up	0.000622	0.00677
REACTOME_P53_DEPENDENT_G1_DNA_DAMAGE_RESPONSE	53	Up	0.000636	0.00683
REACTOME_INHIBITION_OF_THE_PROTEOLYTIC_ACTIVITY_OF_APC_C_REQUIRED_FOR_THE_ONSET_OF_ANAPHASE_BY_MITOTIC_SPINDLE_CHECKPOINT_COMPONENTS	18	Up	0.000638	0.00683
REACTOME_MITOTIC_G2_G2_M_PHASES	76	Up	0.00066	0.00701
REACTOME_RNA_POL_I_PROMOTER_OPENING	45	Up	0.000685	0.00716
REACTOME_L1CAM_INTERACTIONS	80	Up	0.000696	0.0072
REACTOME_CDT1_ASSOCIATION_WITH_THE_CDC6_ORC_ORIGIN_COMPLEX	55	Up	0.000735	0.00739
REACTOME_MITOCHONDRIAL_FATTY_ACID_BETA_OXIDATION	15	Up	0.000746	0.0074
REACTOME_REGULATION_OF_AMPK_ACTIVITY_VIA_LKB1	14	Up	0.000747	0.0074
REACTOME_RESPONSE_TO_ELEVATED_PLATELET_CYTOSOLIC_CA2_	79	Up	0.000782	0.00766
REACTOME_APC_C_CDH1_MEDIATED_DEGRADATION_OF_CDC20_AND_OTHER_APC_C_CDH1_TARGETED_PROTEINS_IN_LATE_MITOSIS_EARLY_G1	65	Up	0.000795	0.0077
REACTOME_SIGNALING_BY_TGF_BETA_RECEPTOR_COMPLEX	61	Up	0.000813	0.00783
REACTOME_SHC_MEDIATED_CASCADE	27	Down	0.000828	0.00791
REACTOME_SIGNALING_BY_WNT	63	Up	0.000838	0.00795
REACTOME_METABOLISM_OF_MRNA	232	Up	0.000913	0.00845
REACTOME_CLEAVAGE_OF_GROWING_TRANSCRIPT_IN_THE_TERMINATION_REGION_	42	Up	0.000918	0.00845
REACTOME_APOPTOSIS	142	Up	0.000923	0.00845
REACTOME_AUTODEGRADATION_OF_THE_E3_UBIQUITIN_LIGASE_COP1	47	Up	0.000937	0.00846
REACTOME_RECRUITMENT_OF_MITOTIC_CENTROSOME_PROTEINS_AND_COMPLEXES	61	Up	0.00101	0.00899
REACTOME_CD28_DEPENDENT_VAV1_PATHWAY	11	Up	0.00102	0.00899
REACTOME_PROCESSING_OF_INTRONLESS_PRE_MRNAS	15	Up	0.00102	0.00899
REACTOME_HEMOSTASIS	432	Up	0.00103	0.00899
REACTOME_SCF_BETA_TRCP_MEDIATED_DEGRADATION_OF_EMI1	49	Up	0.00103	0.00899
REACTOME_GLUCONEOGENESIS	34	Up	0.00105	0.00913
REACTOME_POL_SWITCHING	13	Up	0.00112	0.00962
REACTOME_TCA_CYCLE_AND_RESPIRATORY_ELECTRON_TRANSPORT	128	Up	0.00112	0.00962
REACTOME_CDK_MEDIATED_PHOSPHORYLATION_AND_REMOVAL_OF_CDC6	47	Up	0.00116	0.00984
REACTOME_P53_INDEPENDENT_G1_S_DNA_DAMAGE_CHECKPOINT	49	Up	0.00117	0.00984
REACTOME_TRANSPORT_OF_GLUCOSE_AND_OTHER_SUGARS_BILE_SALTS_AND_ORGANIC_ACIDS_METAL_IONS_AND_AMINE_COMPOUNDS	86	Down	0.00117	0.00984
REACTOME_SIGNALING_BY_THE_B_CELL_RECEPTOR_BCR	122	Up	0.0012	0.00999
REACTOME_NEP_NS2_INTERACTS_WITH_THE_CELLULAR_EXPORT_MACHINERY	27	Up	0.00124	0.0103
REACTOME_AUTODEGRADATION_OF_CDH1_BY_CDH1_APC_C	57	Up	0.00128	0.0104
REACTOME_DOWNSTREAM_SIGNALING_EVENTS_OF_B_CELL_RECEPTOR_BCR	93	Up	0.00129	0.0105
REACTOME_POST_TRANSLATIONAL_PROTEIN_MODIFICATION	172	Up	0.00135	0.0108
REACTOME_GAP_JUNCTION_DEGRADATION	9	Up	0.00136	0.0108
REACTOME_SYNTHESIS_AND_INTERCONVERSION_OF_NUCLEOTIDE_DI_AND_TRIPHOSPHATES	17	Up	0.00142	0.0113
REACTOME_TRANSLATION	165	Up	0.00144	0.0113
REACTOME_CTLA4_INHIBITORY_SIGNALING	22	Up	0.00148	0.0115
REACTOME_ANTIVIRAL_MECHANISM_BY_IFN_STIMULATED_GENES	68	Up	0.00158	0.012
REACTOME_GLOBAL_GENOMIC_NER_GG_NER	33	Up	0.00164	0.0123
REACTOME_DNA_REPAIR	104	Up	0.00167	0.0123
REACTOME_BIOSYNTHESIS_OF_THE_N_GLYCAN_PRECURSOR_DOLICHOL_LIPID_LINKED_OLIGOSACCHARIDE_LLO_AND_TRANSFER_TO_A_NASCENT_PROTEIN	27	Up	0.0017	0.0125
REACTOME_ANTIGEN_PROCESSING_CROSS_PRESENTATION	66	Up	0.00178	0.013
REACTOME_DESTABILIZATION_OF_MRNA_BY_AUF1_HNRNP_D0	51	Up	0.00179	0.013
REACTOME_SIGNALING_BY_ROBO_RECEPTOR	29	Up	0.00183	0.0131
REACTOME_CROSS_PRESENTATION_OF_SOLUBLE_EXOGENOUS_ANTIGENS_ENDOSOMES	45	Up	0.00187	0.0133
REACTOME_TGF_BETA_RECEPTOR_SIGNALING_ACTIVATES_SMADS	25	Up	0.00194	0.0136
REACTOME_ARMS_MEDIATED_ACTIVATION	17	Up	0.002	0.014
REACTOME_LOSS_OF_NLP_FROM_MITOTIC_CENTROSOMES	54	Up	0.00206	0.0143
REACTOME_FORMATION_OF_ATP_BY_CHEMIOSMOTIC_COUPLING	15	Up	0.00235	0.0162
REACTOME_THE_ROLE_OF_NEF_IN_HIV1_REPLICATION_AND_DISEASE_PATHOGENESIS	25	Up	0.00237	0.0162
REACTOME_SCFSKP2_MEDIATED_DEGRADATION_OF_P27_P21	53	Up	0.00242	0.0164
REACTOME_GLUCOSE_TRANSPORT	38	Up	0.00243	0.0165
REACTOME_CYCLIN_E_ASSOCIATED_EVENTS_DURING_G1_S_TRANSITION_	64	Up	0.00246	0.0166
REACTOME_REGULATION_OF_APOPTOSIS	57	Up	0.00248	0.0166
REACTOME_REGULATION_OF_ORNITHINE_DECARBOXYLASE_ODC	48	Up	0.00251	0.0166
REACTOME_DOWNREGULATION_OF_TGF_BETA_RECEPTOR_SIGNALING	22	Up	0.00253	0.0166
REACTOME_RNA_POL_III_TRANSCRIPTION_INITIATION_FROM_TYPE_3_PROMOTER	27	Up	0.00253	0.0166
REACTOME_VITAMIN_B5_PANTOTHENATE_METABOLISM	11	Up	0.00256	0.0166
REACTOME_INFLUENZA_LIFE_CYCLE	156	Up	0.0026	0.0167
REACTOME_PLATELET_SENSITIZATION_BY_LDL	17	Up	0.00261	0.0167
REACTOME_ACTIVATION_OF_NF_KAPPAB_IN_B_CELLS	61	Up	0.00262	0.0167
REACTOME_IMMUNE_SYSTEM	802	Up	0.00272	0.0172
REACTOME_EXTENSION_OF_TELOMERES	27	Up	0.00282	0.0174
REACTOME_MRNA_SPLICING_MINOR_PATHWAY	41	Up	0.0029	0.0178
REACTOME_LYSOSOME_VESICLE_BIOGENESIS	22	Up	0.00295	0.018
REACTOME_DNA_STRAND_ELONGATION	30	Up	0.00301	0.0182
REACTOME_LAGGING_STRAND_SYNTHESIS	19	Up	0.00313	0.0189
REACTOME_ASPARAGINE_N_LINKED_GLYCOSYLATION	78	Up	0.0034	0.0197
REACTOME_ER_PHAGOSOME_PATHWAY	54	Up	0.00346	0.0199
REACTOME_MHC_CLASS_II_ANTIGEN_PRESENTATION	75	Up	0.00349	0.0199
REACTOME_TRANSPORT_TO_THE_GOLGI_AND_SUBSEQUENT_MODIFICATION	32	Up	0.00351	0.0199
REACTOME_ASSOCIATION_OF_LICENSING_FACTORS_WITH_THE_PRE_REPLICATIVE_COMPLEX	14	Up	0.00359	0.0202
REACTOME_FACTORS_INVOLVED_IN_MEGAKARYOCYTE_DEVELOPMENT_AND_PLATELET_PRODUCTION	111	Up	0.00377	0.0209
REACTOME_ETHANOL_OXIDATION	6	Up	0.00381	0.0211
REACTOME_PYRUVATE_METABOLISM_AND_CITRIC_ACID_TCA_CYCLE	39	Up	0.00391	0.0214
REACTOME_REGULATION_OF_GLUCOKINASE_BY_GLUCOKINASE_REGULATORY_PROTEIN	27	Up	0.00392	0.0214
REACTOME_DOUBLE_STRAND_BREAK_REPAIR	21	Up	0.00408	0.0222
REACTOME_SYNTHESIS_OF_PIPS_AT_THE_GOLGI_MEMBRANE	16	Up	0.00415	0.0225
REACTOME_ELONGATION_ARREST_AND_RECOVERY	24	Up	0.00417	0.0225
REACTOME_TRIGLYCERIDE_BIOSYNTHESIS	36	Up	0.00439	0.0233
REACTOME_GAMMA_CARBOXYLATION_TRANSPORT_AND_AMINO_TERMINAL_CLEAVAGE_OF_PROTEINS	10	Down	0.0044	0.0233
REACTOME_POST_CHAPERONIN_TUBULIN_FOLDING_PATHWAY	16	Up	0.00443	0.0234
REACTOME_TRANSCRIPTIONAL_ACTIVITY_OF_SMAD2_SMAD3_SMAD4_HETEROTRIMER	37	Up	0.00445	0.0234
REACTOME_PROCESSING_OF_CAPPED_INTRONLESS_PRE_MRNA	23	Up	0.00456	0.0237
REACTOME_DEADENYLATION_DEPENDENT_MRNA_DECAY	46	Up	0.00464	0.0238
REACTOME_NEGATIVE_REGULATION_OF_FGFR_SIGNALING	36	Down	0.00464	0.0238
REACTOME_RESPIRATORY_ELECTRON_TRANSPORT_ATP_SYNTHESIS_BY_CHEMIOSMOTIC_COUPLING_AND_HEAT_PRODUCTION_BY_UNCOUPLING_PROTEINS_	93	Up	0.0047	0.0239
REACTOME_CDC6_ASSOCIATION_WITH_THE_ORC_ORIGIN_COMPLEX	11	Up	0.00479	0.0242
REACTOME_AMYLOIDS	62	Up	0.0049	0.0245
REACTOME_COMMON_PATHWAY	13	Down	0.0049	0.0245
REACTOME_BILE_ACID_AND_BILE_SALT_METABOLISM	23	Down	0.00512	0.0253
REACTOME_E2F_ENABLED_INHIBITION_OF_PRE_REPLICATION_COMPLEX_FORMATION	10	Up	0.00573	0.0281
REACTOME_XENOBIOTICS	3	Down	0.00591	0.0288
REACTOME_REGULATION_OF_THE_FANCONI_ANEMIA_PATHWAY	9	Up	0.00592	0.0288
REACTOME_MITOTIC_PROMETAPHASE	84	Up	0.00658	0.0318
REACTOME_EGFR_DOWNREGULATION	25	Up	0.00664	0.0319
REACTOME_PROLONGED_ERK_ACTIVATION_EVENTS	19	Up	0.00693	0.033
REACTOME_PKB_MEDIATED_EVENTS	29	Up	0.00722	0.0337
REACTOME_IRON_UPTAKE_AND_TRANSPORT	32	Up	0.00731	0.0338
REACTOME_RNA_POL_II_TRANSCRIPTION_PRE_INITIATION_AND_PROMOTER_OPENING	39	Up	0.00732	0.0338
REACTOME_CTNNB1_PHOSPHORYLATION_CASCADE	16	Up	0.00744	0.0341
REACTOME_NUCLEOTIDE_EXCISION_REPAIR	49	Up	0.00761	0.0346
REACTOME_SYNTHESIS_OF_GLYCOSYLPHOSPHATIDYLINOSITOL_GPI	18	Up	0.00762	0.0346
REACTOME_G1_PHASE	36	Up	0.00787	0.0354
REACTOME_NONSENSE_MEDIATED_DECAY_ENHANCED_BY_THE_EXON_JUNCTION_COMPLEX	126	Up	0.00836	0.0373
REACTOME_G2_M_DNA_DAMAGE_CHECKPOINT	10	Up	0.00864	0.0384
REACTOME_CYTOSOLIC_SULFONATION_OF_SMALL_MOLECULES	10	Down	0.00893	0.0394
REACTOME_3_UTR_MEDIATED_TRANSLATIONAL_REGULATION	126	Up	0.00908	0.0399
REACTOME_COSTIMULATION_BY_THE_CD28_FAMILY	55	Up	0.00915	0.0401
REACTOME_REGULATION_OF_IFNA_SIGNALING	20	Up	0.00938	0.0408
REACTOME_COPI_MEDIATED_TRANSPORT	9	Up	0.00941	0.0408
REACTOME_RNA_POL_III_TRANSCRIPTION	34	Up	0.00994	0.0427
REACTOME_CD28_CO_STIMULATION	31	Up	0.0101	0.0432
REACTOME_SRP_DEPENDENT_COTRANSLATIONAL_PROTEIN_TARGETING_TO_MEMBRANE	127	Up	0.0102	0.0432
REACTOME_SIGNAL_TRANSDUCTION_BY_L1	34	Up	0.0104	0.0435
REACTOME_REGULATION_OF_HYPOXIA_INDUCIBLE_FACTOR_HIF_BY_OXYGEN	22	Up	0.0105	0.0436
REACTOME_METABOLISM_OF_CARBOHYDRATES	227	Up	0.0106	0.0441
REACTOME_BILE_SALT_AND_ORGANIC_ANION_SLC_TRANSPORTERS	11	Down	0.0107	0.0442
REACTOME_FORMATION_OF_INCISION_COMPLEX_IN_GG_NER	21	Up	0.0112	0.0459
REACTOME_ACTIVATION_OF_THE_MRNA_UPON_BINDING_OF_THE_CAP_BINDING_COMPLEX_AND_EIFS_AND_SUBSEQUENT_BINDING_TO_43S	64	Up	0.0114	0.0464
REACTOME_REPAIR_SYNTHESIS_FOR_GAP_FILLING_BY_DNA_POL_IN_TC_NER	14	Up	0.0116	0.047
REACTOME_NEPHRIN_INTERACTIONS	19	Up	0.0117	0.047
REACTOME_SYNTHESIS_OF_PIPS_AT_THE_LATE_ENDOSOME_MEMBRANE	10	Up	0.0117	0.047
REACTOME_RESPIRATORY_ELECTRON_TRANSPORT	75	Up	0.012	0.048
REACTOME_DOWNREGULATION_OF_SMAD2_3_SMAD4_TRANSCRIPTIONAL_ACTIVITY	20	Up	0.0122	0.0484
REACTOME_METABOLISM_OF_LIPIDS_AND_LIPOPROTEINS	447	Up	0.0126	0.0492
REACTOME_CELL_CYCLE	441	Up	0.013	0.0505
REACTOME_ENERGY_DEPENDENT_REGULATION_OF_MTOR_BY_LKB1_AMPK	17	Up	0.013	0.0505
REACTOME_TAK1_ACTIVATES_NFKB_BY_PHOSPHORYLATION_AND_ACTIVATION_OF_IKKS_COMPLEX	24	Down	0.0133	0.0515
REACTOME_HDL_MEDIATED_LIPID_TRANSPORT	14	Down	0.0134	0.0516
REACTOME_SIGNALING_BY_SCF_KIT	75	Up	0.0137	0.0525
REACTOME_PROSTANOID_LIGAND_RECEPTORS	8	Down	0.0139	0.0529
REACTOME_GRB2_EVENTS_IN_ERBB2_SIGNALING	22	Up	0.0142	0.0538
REACTOME_TIGHT_JUNCTION_INTERACTIONS	29	Down	0.0148	0.0559
REACTOME_ENDOSOMAL_SORTING_COMPLEX_REQUIRED_FOR_TRANSPORT_ESCRT	26	Up	0.015	0.0564
REACTOME_SYNTHESIS_OF_SUBSTRATES_IN_N_GLYCAN_BIOSYTHESIS	14	Up	0.0151	0.0564
REACTOME_GRB2_SOS_PROVIDES_LINKAGE_TO_MAPK_SIGNALING_FOR_INTERGRINS_	16	Up	0.0152	0.0565
REACTOME_FORMATION_OF_THE_TERNARY_COMPLEX_AND_SUBSEQUENTLY_THE_43S_COMPLEX	53	Up	0.0155	0.0577
REACTOME_SYNTHESIS_OF_PIPS_AT_THE_PLASMA_MEMBRANE	30	Up	0.0157	0.0581
REACTOME_SHC1_EVENTS_IN_ERBB4_SIGNALING	20	Up	0.0162	0.0596
REACTOME_PROCESSIVE_SYNTHESIS_ON_THE_LAGGING_STRAND	15	Up	0.0165	0.0605
REACTOME_SIGNALING_BY_FGFR3_MUTANTS	11	Down	0.0182	0.065
REACTOME_IRAK2_MEDIATED_ACTIVATION_OF_TAK1_COMPLEX_UPON_TLR7_8_OR_9_STIMULATION	9	Up	0.0189	0.0663
REACTOME_RESOLUTION_OF_AP_SITES_VIA_THE_MULTIPLE_NUCLEOTIDE_PATCH_REPLACEMENT_PATHWAY	17	Up	0.0196	0.0685
REACTOME_GPVI_MEDIATED_ACTIVATION_CASCADE	31	Up	0.0204	0.071
REACTOME_MTORC1_MEDIATED_SIGNALLING	12	Up	0.0204	0.071
REACTOME_TRANSCRIPTION_COUPLED_NER_TC_NER	44	Up	0.0207	0.0716
REACTOME_CREATION_OF_C4_AND_C2_ACTIVATORS	7	Up	0.0211	0.0725
REACTOME_PHOSPHOLIPASE_C_MEDIATED_CASCADE	51	Down	0.0218	0.0746
REACTOME_SIGNALLING_TO_P38_VIA_RIT_AND_RIN	15	Up	0.022	0.0749
REACTOME_PASSIVE_TRANSPORT_BY_AQUAPORINS	10	Down	0.0226	0.0762
REACTOME_PHOSPHOLIPID_METABOLISM	185	Up	0.023	0.0768
REACTOME_FORMATION_OF_THE_HIV1_EARLY_ELONGATION_COMPLEX	27	Up	0.0233	0.0772
REACTOME_G1_S_SPECIFIC_TRANSCRIPTION	17	Up	0.0234	0.0774
REACTOME_CYCLIN_A_B1_ASSOCIATED_EVENTS_DURING_G2_M_TRANSITION	15	Up	0.0238	0.0784
REACTOME_MRNA_CAPPING	28	Up	0.0242	0.0788
REACTOME_TRANSFERRIN_ENDOCYTOSIS_AND_RECYCLING	23	Up	0.0242	0.0788
REACTOME_BINDING_AND_ENTRY_OF_HIV_VIRION	5	Up	0.0243	0.0788
REACTOME_GLYCOGEN_BREAKDOWN_GLYCOGENOLYSIS	14	Up	0.0245	0.0789
REACTOME_RAF_MAP_KINASE_CASCADE	10	Up	0.0245	0.0789
REACTOME_ACTIVATION_OF_THE_AP1_FAMILY_OF_TRANSCRIPTION_FACTORS	10	Up	0.0247	0.0791
REACTOME_SYNTHESIS_OF_PIPS_AT_THE_EARLY_ENDOSOME_MEMBRANE	12	Up	0.0248	0.0791
REACTOME_RNA_POL_I_TRANSCRIPTION_INITIATION	24	Up	0.0254	0.0809
REACTOME_TRANSLOCATION_OF_ZAP_70_TO_IMMUNOLOGICAL_SYNAPSE	7	Down	0.0255	0.0809
REACTOME_INFLUENZA_VIRAL_RNA_TRANSCRIPTION_AND_REPLICATION	121	Up	0.0259	0.0821
REACTOME_SIGNALING_BY_HIPPO	20	Up	0.0262	0.0827
REACTOME_APOPTOTIC_EXECUTION_PHASE	52	Up	0.0269	0.0844
REACTOME_INSULIN_RECEPTOR_RECYCLING	21	Up	0.027	0.0844
REACTOME_BASE_EXCISION_REPAIR	19	Up	0.0271	0.0845
REACTOME_RECYCLING_OF_BILE_ACIDS_AND_SALTS	8	Down	0.0277	0.0862
REACTOME_SHC1_EVENTS_IN_EGFR_SIGNALING	15	Up	0.0279	0.0863
REACTOME_FRS2_MEDIATED_CASCADE	35	Down	0.0308	0.0925
REACTOME_ACTIVATION_OF_RAC	13	Up	0.0311	0.0931
REACTOME_DOPAMINE_NEUROTRANSMITTER_RELEASE_CYCLE	11	Down	0.0315	0.094
REACTOME_SEROTONIN_RECEPTORS	11	Down	0.0321	0.0954
REACTOME_SIGNALING_BY_FGFR_MUTANTS	43	Down	0.0322	0.0955
REACTOME_EICOSANOID_LIGAND_BINDING_RECEPTORS	12	Down	0.0333	0.098
REACTOME_PI_3K_CASCADE	54	Down	0.0333	0.098
REACTOME_THE_NLRP3_INFLAMMASOME	10	Up	0.0345	0.101
REACTOME_INITIAL_TRIGGERING_OF_COMPLEMENT	12	Up	0.0349	0.102
REACTOME_PURINE_METABOLISM	33	Up	0.0349	0.102
REACTOME_PEPTIDE_CHAIN_ELONGATION	105	Up	0.0363	0.105
REACTOME_SIGNALING_BY_ACTIVATED_POINT_MUTANTS_OF_FGFR1	11	Down	0.0377	0.107
REACTOME_FGFR4_LIGAND_BINDING_AND_ACTIVATION	11	Down	0.039	0.11
REACTOME_DEGRADATION_OF_THE_EXTRACELLULAR_MATRIX	25	Down	0.0399	0.111
REACTOME_FATTY_ACYL_COA_BIOSYNTHESIS	17	Up	0.0421	0.116
REACTOME_DIGESTION_OF_DIETARY_CARBOHYDRATE	4	Down	0.0437	0.119
REACTOME_AMINE_COMPOUND_SLC_TRANSPORTERS	26	Down	0.0439	0.119
REACTOME_INTERFERON_SIGNALING	135	Up	0.0445	0.12
REACTOME_CALNEXIN_CALRETICULIN_CYCLE	11	Up	0.0446	0.12
REACTOME_RNA_POL_III_TRANSCRIPTION_TERMINATION	20	Up	0.0447	0.12
REACTOME_PD1_SIGNALING	11	Down	0.0449	0.121
REACTOME_CELL_CELL_JUNCTION_ORGANIZATION	57	Down	0.0455	0.122
REACTOME_PURINE_CATABOLISM	10	Up	0.0463	0.123
REACTOME_DEADENYLATION_OF_MRNA	21	Up	0.0467	0.124
REACTOME_HOMOLOGOUS_RECOMBINATION_REPAIR_OF_REPLICATION_INDEPENDENT_DOUBLE_STRAND_BREAKS	15	Up	0.0473	0.125
REACTOME_GAP_JUNCTION_TRAFFICKING	24	Up	0.0475	0.125
REACTOME_TRYPTOPHAN_CATABOLISM	11	Down	0.0475	0.125
REACTOME_TRANSCRIPTIONAL_REGULATION_OF_WHITE_ADIPOCYTE_DIFFERENTIATION	73	Up	0.048	0.126
REACTOME_STRIATED_MUSCLE_CONTRACTION	28	Down	0.0484	0.126
REACTOME_TGF_BETA_RECEPTOR_SIGNALING_IN_EMT_EPITHELIAL_TO_MESENCHYMAL_TRANSITION	15	Up	0.0486	0.127
REACTOME_RETROGRADE_NEUROTROPHIN_SIGNALLING	13	Up	0.0496	0.128
REACTOME_SHC_MEDIATED_SIGNALLING	15	Up	0.0502	0.129
REACTOME_PURINE_RIBONUCLEOSIDE_MONOPHOSPHATE_BIOSYNTHESIS	12	Up	0.0506	0.13
REACTOME_SIGNALING_BY_EGFR_IN_CANCER	106	Up	0.0516	0.132
REACTOME_ADVANCED_GLYCOSYLATION_ENDPRODUCT_RECEPTOR_SIGNALING	14	Up	0.053	0.134
REACTOME_ACYL_CHAIN_REMODELLING_OF_PI	15	Down	0.0534	0.135
REACTOME_G0_AND_EARLY_G1	23	Up	0.0535	0.135
REACTOME_CELL_SURFACE_INTERACTIONS_AT_THE_VASCULAR_WALL	81	Up	0.0538	0.135
REACTOME_NEF_MEDIATES_DOWN_MODULATION_OF_CELL_SURFACE_RECEPTORS_BY_RECRUITING_THEM_TO_CLATHRIN_ADAPTERS	18	Up	0.0565	0.141
REACTOME_GLUCURONIDATION	3	Up	0.0576	0.143
REACTOME_TRAF6_MEDIATED_INDUCTION_OF_TAK1_COMPLEX	14	Up	0.0588	0.145
REACTOME_NEGATIVE_REGULATORS_OF_RIG_I_MDA5_SIGNALING	29	Up	0.0593	0.146
REACTOME_DIABETES_PATHWAYS	121	Up	0.0594	0.146
REACTOME_UNWINDING_OF_DNA	11	Up	0.0628	0.152
REACTOME_SOS_MEDIATED_SIGNALLING	15	Up	0.0653	0.157
REACTOME_BASE_FREE_SUGAR_PHOSPHATE_REMOVAL_VIA_THE_SINGLE_NUCLEOTIDE_REPLACEMENT_PATHWAY	10	Up	0.066	0.159
REACTOME_FACILITATIVE_NA_INDEPENDENT_GLUCOSE_TRANSPORTERS	11	Down	0.067	0.16
REACTOME_CHOLESTEROL_BIOSYNTHESIS	21	Up	0.0678	0.161
REACTOME_RIP_MEDIATED_NFKB_ACTIVATION_VIA_DAI	19	Down	0.068	0.161
REACTOME_ION_TRANSPORT_BY_P_TYPE_ATPASES	33	Up	0.0687	0.162
REACTOME_SIGNALING_BY_CONSTITUTIVELY_ACTIVE_EGFR	18	Up	0.0689	0.162
REACTOME_FGFR1_LIGAND_BINDING_AND_ACTIVATION	14	Down	0.0711	0.166
REACTOME_N_GLYCAN_TRIMMING_IN_THE_ER_AND_CALNEXIN_CALRETICULIN_CYCLE	13	Up	0.072	0.168
REACTOME_TRAF6_MEDIATED_NFKB_ACTIVATION	22	Down	0.0732	0.17
REACTOME_TRANSPORT_OF_VITAMINS_NUCLEOSIDES_AND_RELATED_MOLECULES	28	Down	0.0737	0.171
REACTOME_SIGNALLING_TO_ERKS	36	Up	0.0739	0.171
REACTOME_FANCONI_ANEMIA_PATHWAY	21	Up	0.0742	0.172
REACTOME_NEGATIVE_REGULATION_OF_THE_PI3K_AKT_NETWORK	7	Down	0.0748	0.172
REACTOME_UNFOLDED_PROTEIN_RESPONSE	73	Up	0.0749	0.172
REACTOME_RNA_POL_III_TRANSCRIPTION_INITIATION_FROM_TYPE_2_PROMOTER	24	Up	0.0754	0.173
REACTOME_P130CAS_LINKAGE_TO_MAPK_SIGNALING_FOR_INTEGRINS	16	Up	0.0763	0.174
REACTOME_MAP_KINASE_ACTIVATION_IN_TLR_CASCADE	49	Up	0.0768	0.175
REACTOME_KERATAN_SULFATE_DEGRADATION	10	Down	0.0771	0.175
REACTOME_BRANCHED_CHAIN_AMINO_ACID_CATABOLISM	18	Down	0.0772	0.175
REACTOME_NUCLEAR_SIGNALING_BY_ERBB4	36	Down	0.0776	0.175
REACTOME_HYALURONAN_UPTAKE_AND_DEGRADATION	10	Down	0.0783	0.176
REACTOME_SYNTHESIS_OF_VERY_LONG_CHAIN_FATTY_ACYL_COAS	13	Up	0.0794	0.178
REACTOME_AMINE_LIGAND_BINDING_RECEPTORS	35	Down	0.0809	0.18
REACTOME_NETRIN1_SIGNALING	37	Up	0.0822	0.183
REACTOME_ANTIGEN_PRESENTATION_FOLDING_ASSEMBLY_AND_PEPTIDE_LOADING_OF_CLASS_I_MHC	15	Up	0.0824	0.183
REACTOME_PHOSPHORYLATION_OF_CD3_AND_TCR_ZETA_CHAINS	9	Down	0.0838	0.185
REACTOME_SHC_RELATED_EVENTS	16	Up	0.0842	0.186
REACTOME_FGFR2C_LIGAND_BINDING_AND_ACTIVATION	12	Down	0.0849	0.187
REACTOME_RECEPTOR_LIGAND_BINDING_INITIATES_THE_SECOND_PROTEOLYTIC_CLEAVAGE_OF_NOTCH_RECEPTOR	12	Up	0.0863	0.188
REACTOME_CELL_JUNCTION_ORGANIZATION	77	Down	0.0881	0.192
REACTOME_REGULATION_OF_KIT_SIGNALING	15	Up	0.0883	0.192
REACTOME_SMAD2_SMAD3_SMAD4_HETEROTRIMER_REGULATES_TRANSCRIPTION	26	Up	0.089	0.193
REACTOME_ACTIVATED_POINT_MUTANTS_OF_FGFR2	16	Down	0.0914	0.197
REACTOME_AXON_GUIDANCE	238	Up	0.0917	0.198
REACTOME_PLATELET_HOMEOSTASIS	77	Up	0.0921	0.198
REACTOME_SEMA4D_INDUCED_CELL_MIGRATION_AND_GROWTH_CONE_COLLAPSE	25	Up	0.0926	0.199
REACTOME_CYTOCHROME_P450_ARRANGED_BY_SUBSTRATE_TYPE	29	Down	0.0939	0.201
REACTOME_MEMBRANE_BINDING_AND_TARGETTING_OF_GAG_PROTEINS	10	Up	0.0946	0.202
REACTOME_RNA_POL_III_CHAIN_ELONGATION	18	Up	0.0958	0.204
REACTOME_LIPOPROTEIN_METABOLISM	26	Down	0.101	0.212
REACTOME_ACETYLCHOLINE_NEUROTRANSMITTER_RELEASE_CYCLE	10	Down	0.106	0.22
REACTOME_SIGNALING_BY_FGFR1_MUTANTS	29	Down	0.107	0.222
REACTOME_CYTOKINE_SIGNALING_IN_IMMUNE_SYSTEM	243	Up	0.108	0.223
REACTOME_LIGAND_GATED_ION_CHANNEL_TRANSPORT	20	Down	0.109	0.225
REACTOME_METABOLISM_OF_NUCLEOTIDES	72	Up	0.11	0.226
REACTOME_THROMBIN_SIGNALLING_THROUGH_PROTEINASE_ACTIVATED_RECEPTORS_PARS	32	Up	0.11	0.226
REACTOME_LATENT_INFECTION_OF_HOMO_SAPIENS_WITH_MYCOBACTERIUM_TUBERCULOSIS	30	Up	0.112	0.229
REACTOME_RNA_POL_I_TRANSCRIPTION_TERMINATION	21	Up	0.112	0.229
REACTOME_ABACAVIR_TRANSPORT_AND_METABOLISM	8	Down	0.114	0.231
REACTOME_FORMATION_OF_TRANSCRIPTION_COUPLED_NER_TC_NER_REPAIR_COMPLEX	29	Up	0.114	0.231
REACTOME_PECAM1_INTERACTIONS	10	Up	0.115	0.233
REACTOME_ACTIVATION_OF_IRF3_IRF7_MEDIATED_BY_TBK1_IKK_EPSILON	14	Up	0.116	0.234
REACTOME_SYNTHESIS_OF_BILE_ACIDS_AND_BILE_SALTS_VIA_24_HYDROXYCHOLESTEROL	9	Down	0.12	0.239
REACTOME_SYNTHESIS_OF_PA	26	Up	0.12	0.239
REACTOME_SIGNALING_BY_ERBB2	98	Up	0.126	0.248
REACTOME_NOREPINEPHRINE_NEUROTRANSMITTER_RELEASE_CYCLE	10	Down	0.127	0.249
